# Supplementary material for: The Fruit Proteome Response to the Ripening Stages in Three Tomato Genotypes
Source: MDPI journal article supplement (doi:10.3390/plants11040553), 2022-02-19
Supplement: s1 [file s1]

**Table S1.** Functional classification of proteins on three tomato color genotypes by ripening stages. Data were classified or unclassified according to the MIPS functional category in the organism.

| Spot no <sup>z</sup>                             | Matched protein                             | ID (NCBI)    | Organism                    | Mr/pI       | MP <sup>y</sup> | SC <sup>x</sup> |
|--------------------------------------------------|---------------------------------------------|--------------|-----------------------------|-------------|-----------------|-----------------|
| <b>01 Metabolism 01.01 Amino acid metabolism</b> |                                             |              |                             |             |                 |                 |
| 23                                               | Glycine-rich protein                        | Q04130       | <i>Solanum lycopersicum</i> | 7327/9.92   | 4               | 60              |
| 81                                               | Leucine-rich repeat extensin-like protein 3 | gi 645235871 | <i>Solanum lycopersicum</i> | 40453/12.46 | 14              | 29              |
| 82                                               | Methionine sulfoxide reductase A            | G3JX11       | <i>Solanum lycopersicum</i> | 21346/6.09  | 4               | 25              |
| 83                                               | Methionine sulfoxide reductase A            | G3JX11       | <i>Solanum lycopersicum</i> | 21346/6.09  | 3               | 21              |
| 124                                              | Leucine-rich repeat extensin-like protein 3 | gi 645235871 | <i>Prunus mume</i>          | 40453/12.46 | 13              | 27              |
| 139                                              | Lactoylglutathione lyase-like               | gi 460373807 | <i>Solanum lycopersicum</i> | 32955/5.95  | 7               | 17              |
| 140                                              | Cysteine synthase                           | K4CVI4       | <i>Solanum lycopersicum</i> | 34335/5.93  | 14              | 49              |
| 145                                              | Lactoylglutathione lyase-like               | gi 460373807 | <i>Solanum lycopersicum</i> | 32955/5.95  | 13              | 36              |
| 148                                              | lactoylglutathione lyase-like               | gi 460373807 | <i>Solanum lycopersicum</i> | 32955/5.95  | 7               | 17              |
| 166                                              | Aspartate-semialdehyde dehydrogenase-like   | gi 460365718 | <i>Solanum lycopersicum</i> | 41785/7.01  | 3               | 10              |
| 177                                              | Arginase 2                                  | Arginase 2   | <i>Solanum lycopersicum</i> | 36943/5.60  | 13              | 38              |
| 178                                              | Arginase 1                                  | Arginase 1   | <i>Solanum lycopersicum</i> | 37140/5.96  | 9               | 21              |
| 180                                              | Methylthioribose-1-phosphate isomerase      | K4CJP1       | <i>Solanum lycopersicum</i> | 39543/5.66  | 9               | 25              |
| 187                                              | Glutamine synthase                          | Q42874       | <i>Solanum lycopersicum</i> | 18735/6.13  | 5               | 25              |

**Table S1.** Continued.

| Spot no <sup>z</sup>                                | Matched protein                                                   | ID (NCBI)    | Organism                    | Mr/pI      | MP <sup>y</sup> | SC <sup>x</sup> |
|-----------------------------------------------------|-------------------------------------------------------------------|--------------|-----------------------------|------------|-----------------|-----------------|
| <b>01.05 C-compound and carbohydrate metabolism</b> |                                                                   |              |                             |            |                 |                 |
| 189                                                 | Glutamine synthase                                                | Q42874       | <i>Solanum lycopersicum</i> | 18735/6.13 | 5               | 22              |
| 191                                                 | Cysteine synthase, chloroplastic/chromoplastic-like isoform 1     | gi 460398434 | <i>Solanum lycopersicum</i> | 41261/5.41 | 9               | 32              |
| 198                                                 | Hop-interacting protein THI113                                    | G8Z279       | <i>Solanum lycopersicum</i> | 37340/5.82 | 12              | 62              |
| 200                                                 | S-adenosylmethionine synthase 1                                   | P43280       | <i>Solanum lycopersicum</i> | 43730/5.52 | 11              | 34              |
| 204                                                 | S-adenosylmethionine synthase 2                                   | P43281       | <i>Solanum lycopersicum</i> | 43511/5.41 | 11              | 37              |
| 212                                                 | Hop-interacting protein THI111                                    | G8Z278       | <i>Solanum lycopersicum</i> | 44905/5.10 | 8               | 18              |
| 249                                                 | N-carbamoyl-L-amino acid hydrolase-like                           | gi 460404363 | <i>Solanum lycopersicum</i> | 52976/5.81 | 9               | 17              |
| 13                                                  | Ribulose biphosphate carboxylase small chain 3A/3C, chloroplastic | P07180       | <i>Solanum lycopersicum</i> | 20446/6.73 | 9               | 48              |
| 14                                                  | Ribulose biphosphate carboxylase small chain 1, chloroplastic     | P08706       | <i>Solanum lycopersicum</i> | 20522/7.57 | 8               | 31              |
| 90                                                  | Beta-mannosidase                                                  | Q8VWL8       | <i>Solanum lycopersicum</i> | 59536/8.76 | 8               | 10              |
| 125                                                 | Beta-mannosidase                                                  | Q8VWL8       | <i>Solanum lycopersicum</i> | 59536/8.76 | 13              | 14              |
| 141                                                 | Fructokinase-2                                                    | Q42896       | <i>Solanum lycopersicum</i> | 34969/5.76 | 9               | 27              |
| 142                                                 | Fructokinase-2                                                    | Q42896       | <i>Solanum lycopersicum</i> | 34969/5.76 | 16              | 55              |
| 158                                                 | UDP-glucuronic acid decarboxylase 1-like                          | gi 460382055 | <i>Solanum lycopersicum</i> | 38714/6.41 | 15              | 44              |

**Table S1.** Continued.

| Spot no <sup>z</sup>                                                  | Matched protein                                    | ID (NCBI)    | Organism                    | Mr/pI      | MP <sup>y</sup> | SC <sup>x</sup> |
|-----------------------------------------------------------------------|----------------------------------------------------|--------------|-----------------------------|------------|-----------------|-----------------|
| <b>01.07 Metabolism of vitamins, cofactors, and prosthetic groups</b> |                                                    |              |                             |            |                 |                 |
| 185                                                                   | Coproporphyrinogen-III oxidase, chloroplastic-like | gi 460405900 | <i>Solanum lycopersicum</i> | 45252/5.92 | 8               | 15              |
| <b>01.20 Secondary metabolism</b>                                     |                                                    |              |                             |            |                 |                 |
| 95                                                                    | Glutathione S-transferase-like                     | gi 460389800 | <i>Solanum lycopersicum</i> | 23708/5.98 | 6               | 45              |
| 98                                                                    | Dehydroascorbate reductase                         | Q4VDN8       | <i>Solanum lycopersicum</i> | 23694/6.32 | 12              | 52              |
| 146                                                                   | Aspartic proteinase A1-like isoform 2              | gi 460395834 | <i>Solanum lycopersicum</i> | 55908/5.65 | 12              | 24              |
| <b>02 Energy      02.01 Glycolysis and gluconeogenesis</b>            |                                                    |              |                             |            |                 |                 |
| 99                                                                    | Triosephosphate isomerase                          | K4BPK4       | <i>Solanum lycopersicum</i> | 27658/5.47 | 14              | 77              |
| 100                                                                   | Triosephosphate isomerase                          | K4BPK4       | <i>Solanum lycopersicum</i> | 27658/5.47 | 10              | 35              |
| 101                                                                   | Triosephosphate isomerase                          | K4BPK4       | <i>Solanum lycopersicum</i> | 27658/5.47 | 8               | 25              |
| 104                                                                   | Triosephosphate isomerase                          | K4B3X5       | <i>Solanum lycopersicum</i> | 35043/6.45 | 17              | 59              |
| 106                                                                   | Triosephosphate isomerase                          | K4B3X5       | <i>Solanum lycopersicum</i> | 35043/6.45 | 8               | 34              |
| 138                                                                   | Fructose-bisphosphate aldolase                     | K4BAW0       | <i>Solanum lycopersicum</i> | 42656/8.15 | 7               | 20              |
| 157                                                                   | Glyceraldehyde 3-phosphate dehydrogenase           | O04891       | <i>Solanum lycopersicum</i> | 32097/5.93 | 10              | 30              |
| 159                                                                   | Glyceraldehyde 3-phosphate dehydrogenase           | O04891       | <i>Solanum lycopersicum</i> | 32097/5.93 | 16              | 48              |
| 162                                                                   | Glyceraldehyde 3-phosphate dehydrogenase           | O04891       | <i>Solanum lycopersicum</i> | 32097/5.93 | 16              | 53              |

**Table S1.** Continued.

| Spot no <sup>z</sup>                        | Matched protein                                                      | ID (NCBI)    | Organism                    | Mr/pI      | MP <sup>y</sup> | SC <sup>x</sup> |
|---------------------------------------------|----------------------------------------------------------------------|--------------|-----------------------------|------------|-----------------|-----------------|
| 168                                         | Glyceraldehyde-3-phosphate dehydrogenase                             | gi 525314339 | <i>Solanum lycopersicum</i> | 32100/5.93 | 7               | 20              |
| 193                                         | Phosphoglycerate kinase                                              | K4CHY3       | <i>Solanum lycopersicum</i> | 42263/5.78 | 9               | 36              |
| 197                                         | Phosphoglycerate kinase, cytosolic-like                              | gi 460396822 | <i>Solanum lycopersicum</i> | 39627/6.49 | 8               | 31              |
| 202                                         | Phosphoglycerate kinase                                              | K4CHY4       | <i>Solanum lycopersicum</i> | 50592/7.66 | 13              | 38              |
| 220                                         | Enolase-like                                                         | gi 460408278 | <i>Solanum lycopersicum</i> | 48211/5.99 | 12              | 34              |
| 222                                         | Enolase                                                              | P26300       | <i>Solanum lycopersicum</i> | 48054/5.68 | 13              | 40              |
| 223                                         | Enolase                                                              | P26300       | <i>Solanum lycopersicum</i> | 48054/5.68 | 11              | 36              |
| 224                                         | Enolase                                                              | P26300       | <i>Solanum lycopersicum</i> | 48054/5.68 | 11              | 36              |
| 225                                         | Enolase                                                              | P26301       | <i>Solanum lycopersicum</i> | 48054/5.69 | 10              | 32              |
| 264                                         | Glyceraldehyde 3-phosphate dehydrogenase                             | Q7Y0S2       | <i>Solanum lycopersicum</i> | 28957/5.70 | 8               | 18              |
| 268                                         | 2,3-bisphosphoglycerate-independent phosphoglycerate mutase-like     | gi 460396104 | <i>Solanum lycopersicum</i> | 61278/5.59 | 13              | 21              |
| 271                                         | 2,3-bisphosphoglycerate-independent phosphoglycerate mutase-like     | gi 460396104 | <i>Solanum lycopersicum</i> | 61278/5.59 | 11              | 19              |
| <b>02.08 Pyruvate dehydrogenase complex</b> |                                                                      |              |                             |            |                 |                 |
| 184                                         | Pyruvate dehydrogenase E1 component subunit beta, mitochondrial-like | gi 460391698 | <i>Solanum lycopersicum</i> | 39804/6.18 | 7               | 21              |
| 245                                         | Dihydrolipoyl dehydrogenase                                          | K4DHT1       | <i>Solanum lycopersicum</i> | 53662/6.29 | 13              | 27              |

**Table S1.** Continued.

| Spot no <sup>z</sup>                    | Matched protein                                                                      | ID (NCBI)    | Organism                    | Mr/pI      | MP <sup>y</sup> | SC <sup>x</sup> |
|-----------------------------------------|--------------------------------------------------------------------------------------|--------------|-----------------------------|------------|-----------------|-----------------|
| <b>02.10 Tricarboxylic-acid pathway</b> |                                                                                      |              |                             |            |                 |                 |
| 144                                     | Malate dehydrogenase, chloroplastic-like isoform 2                                   | gi 460380476 | <i>Solanum lycopersicum</i> | 43570/8.34 | 9               | 25              |
| 161                                     | Malate dehydrogenase                                                                 | K4CW40       | <i>Solanum lycopersicum</i> | 35703/5.91 | 15              | 62              |
| 163                                     | Malate dehydrogenase                                                                 | K4CGU8       | <i>Solanum lycopersicum</i> | 36287/8.73 | 11              | 38              |
| 165                                     | Malate dehydrogenase                                                                 | K4CW40       | <i>Solanum lycopersicum</i> | 35703/5.91 | 12              | 53              |
| 169                                     | Malate dehydrogenase                                                                 | K4CGU8       | <i>Solanum lycopersicum</i> | 36287/8.73 | 5               | 13              |
| <b>02.13 Respiration</b>                |                                                                                      |              |                             |            |                 |                 |
| 269                                     | Succinate dehydrogenase [ubiquinone] flavoprotein subunit 1, mitochondrial isoform 2 | gi 359476705 | <i>Solanum lycopersicum</i> | 69314/6.14 | 6               | 12              |
| 285                                     | NADH dehydrogenase [ubiquinone] iron-sulfur protein 1, mitochondrial-like            | gi 460409554 | <i>Solanum lycopersicum</i> | 80784/5.90 | 10              | 13              |
| 286                                     | NADH dehydrogenase [ubiquinone] iron-sulfur protein 1, mitochondrial-like            | gi 460409554 | <i>Solanum lycopersicum</i> | 80784/5.90 | 16              | 18              |
| <b>02.16 Fermentation</b>               |                                                                                      |              |                             |            |                 |                 |
| 114                                     | Alcohol dehydrogenase homolog (Fragment)                                             | Q40133       | <i>Solanum lycopersicum</i> | 26357/5.64 | 5               | 21              |
| <b>02.30 Photosynthesis</b>             |                                                                                      |              |                             |            |                 |                 |
| 67                                      | Oxygen-evolving enhancer protein 2, chloroplastic                                    | P29795       | <i>Solanum lycopersicum</i> | 27946/8.26 | 4               | 16              |
| 68                                      | Oxygen-evolving enhancer protein 2, chloroplastic                                    | K4CEP4       | <i>Solanum lycopersicum</i> | 27861/7.63 | 12              | 55              |
| 69                                      | Oxygen-evolving enhancer protein 2, chloroplastic                                    | P29795       | <i>Solanum lycopersicum</i> | 27946/8.26 | 3               | 10              |
| 70                                      | Oxygen-evolving enhancer protein 2, chloroplastic                                    | P29795       | <i>Solanum lycopersicum</i> | 27946/8.26 | 4               | 13              |

**Table S1.** Continued.

| Spot no <sup>z</sup>                                             | Matched protein                                          | ID (NCBI)    | Organism                    | Mr/pI      | MP <sup>y</sup> | SC <sup>x</sup> |
|------------------------------------------------------------------|----------------------------------------------------------|--------------|-----------------------------|------------|-----------------|-----------------|
| <b>02.45 Energy conversion and regeneration</b>                  |                                                          |              |                             |            |                 |                 |
| 74                                                               | Oxygen-evolving enhancer protein 2, chloroplastic        | P29795       | <i>Solanum lycopersicum</i> | 27946/8.26 | 3               | 10              |
| 149                                                              | Oxygen-evolving enhancer protein 1, chloroplastic        | P23322       | <i>Solanum lycopersicum</i> | 35154/5.91 | 12              | 52              |
| 150                                                              | Oxygen-evolving enhancer protein 1, chloroplastic        | P23322       | <i>Solanum lycopersicum</i> | 35154/5.91 | 10              | 36              |
| 151                                                              | Oxygen-evolving enhancer protein 1, chloroplastic        | P23322       | <i>Solanum lycopersicum</i> | 35154/5.91 | 5               | 20              |
| 97                                                               | Probable adenylate kinase 2, chloroplastic-like          | gi 460392461 | <i>Solanum lycopersicum</i> | 32299/6.97 | 13              | 40              |
| 111                                                              | Probable ATP synthase 24 kDa subunit, mitochondrial-like | gi 460415839 | <i>Solanum lycopersicum</i> | 27754/8.69 | 9               | 42              |
| 226                                                              | ATP synthase subunit beta, chloroplastic                 | Q2MI93       | <i>Solanum lycopersicum</i> | 53491/5.28 | 24              | 60              |
| 227                                                              | ATP synthase subunit beta (Fragment)                     | A8Y6N6       | <i>Solanum lycopersicum</i> | 35930/5.18 | 7               | 23              |
| 228                                                              | ATP synthase subunit beta                                | K4BNR2       | <i>Solanum lycopersicum</i> | 59939/5.94 | 20              | 46              |
| 229                                                              | ATP synthase subunit beta                                | K4BX20       | <i>Solanum lycopersicum</i> | 59684/5.74 | 21              | 49              |
| 230                                                              | ATP synthase subunit beta                                | K4BX20       | <i>Solanum lycopersicum</i> | 59684/5.75 | 22              | 54              |
| 254                                                              | ATP synthase subunit alpha, chloroplastic                | Q2MIB5       | <i>Solanum lycopersicum</i> | 55434/5.14 | 13              | 25              |
| 255                                                              | ATP synthase subunit alpha, chloroplastic                | Q2MIB5       | <i>Solanum lycopersicum</i> | 55434/5.15 | 15              | 30              |
| <b>04 Storage protein    04.01 Storage facilitating proteins</b> |                                                          |              |                             |            |                 |                 |
| 48                                                               | 11S globulin subunit beta-like                           | gi 449480612 | <i>Cucumis sativus</i>      | 54479/7.68 | 11              | 22              |

**Table S1.** Continued.

| Spot no <sup>z</sup>                                            | Matched protein                                    | ID (NCBI)    | Organism                    | Mr/pI       | MP <sup>y</sup> | SC <sup>x</sup> |
|-----------------------------------------------------------------|----------------------------------------------------|--------------|-----------------------------|-------------|-----------------|-----------------|
| <b>10 Cell cycle and DNA processing    10.01 DNA processing</b> |                                                    |              |                             |             |                 |                 |
| 16                                                              | Histone H4                                         | gi 195635409 | <i>Zea mays</i>             | 20121/9.68  | 5               | 23              |
| 235                                                             | Putative DNA repair protein RAD23-3-like isoform 2 | gi 460375404 | <i>Solanum lycopersicum</i> | 38831/4.67  | 7               | 26              |
| 236                                                             | Putative DNA repair protein RAD23-3-like isoform 2 | gi 460375404 | <i>Solanum lycopersicum</i> | 38831/4.67  | 5               | 17              |
| <b>10.03 Cell cycle</b>                                         |                                                    |              |                             |             |                 |                 |
| 18                                                              | Profilin                                           | Q8VWR0       | <i>Solanum lycopersicum</i> | 14187/4.71  | 5               | 37              |
| 19                                                              | Profilin-2                                         | Q93YG7       | <i>Solanum lycopersicum</i> | 14362/4.63  | 4               | 24              |
| <b>12 Protein synthesis    12.01 Ribosome biogenesis</b>        |                                                    |              |                             |             |                 |                 |
| 8                                                               | 40S ribosomal protein S21                          | K4AWT4       | <i>Solanum lycopersicum</i> | 9359/6.71   | 4               | 65              |
| 27                                                              | 60S acidic ribosomal protein P2B-like isoform 2    | gi 460411272 | <i>Solanum lycopersicum</i> | 11412/4.55  | 2               | 30              |
| 44                                                              | small ribosomal protein 4                          | gi 11228656  | <i>Leucoloma serrulatum</i> | 22211/10.53 | 11              | 52              |
| 71                                                              | 50S ribosomal protein L12, chloroplastic-like      | gi 460372985 | <i>Solanum lycopersicum</i> | 19579/6.11  | 4               | 20              |
| 75                                                              | 40S ribosomal protein S7-like isoform 2            | gi 460392051 | <i>Solanum lycopersicum</i> | 22114/9.80  | 8               | 32              |
| 77                                                              | Small heat shock protein, chloroplastic            | Q95661       | <i>Solanum lycopersicum</i> | 26267/7.85  | 12              | 54              |
| 79                                                              | Small heat shock protein, chloroplastic            | Q95661       | <i>Solanum lycopersicum</i> | 26267/7.85  | 3               | 11              |
| 96                                                              | 60S ribosomal protein L10                          | Q3SC85       | <i>Solanum lycopersicum</i> | 25301/10.45 | 7               | 29              |

**Table S1.** Continued.

| Spot no <sup>z</sup>               | Matched protein                                  | ID (NCBI)    | Organism                    | Mr/pI       | MP <sup>y</sup> | SC <sup>x</sup> |
|------------------------------------|--------------------------------------------------|--------------|-----------------------------|-------------|-----------------|-----------------|
| 234                                | 26S protease regulatory subunit 6A homolog       | P54776       | <i>Solanum lycopersicum</i> | 47704/4.94  | 20              | 49              |
| 266                                | T-complex protein 1 subunit beta-like            | gi 460411410 | <i>Solanum lycopersicum</i> | 57279/5.67  | 6               | 13              |
| 272                                | 60S ribosomal protein L35a-3-like                | gi 460388544 | <i>Solanum lycopersicum</i> | 13026/10.41 | 3               | 19              |
| 275                                | 60S ribosomal protein L35a-3-like                | gi 460388544 | <i>Solanum lycopersicum</i> | 13026/10.41 | 3               | 19              |
| 279                                | Heat shock protein 70 isoform 2                  | H1ZXA8       | <i>Solanum lycopersicum</i> | 71142/5.08  | 19              | 34              |
| 280                                | Heat shock protein 70 isoform 3                  | H1ZXA9       | <i>Solanum lycopersicum</i> | 71744/5.14  | 19              | 33              |
| 281                                | Heat shock cognate 70 kDa protein 2-like         | gi 460408280 | <i>Solanum lycopersicum</i> | 71141/5.08  | 18              | 32              |
| 282                                | Heat shock protein 70                            | A8W7B5       | <i>Solanum lycopersicum</i> | 74415/5.41  | 18              | 26              |
| 283                                | Heat shock protein 70                            | A8W7B5       | <i>Solanum lycopersicum</i> | 74415/5.41  | 16              | 24              |
| 284                                | Heat shock protein 70                            | A8W7B5       | <i>Solanum lycopersicum</i> | 74415/5.41  | 13              | 18              |
| <b>12.04 Translation</b>           |                                                  |              |                             |             |                 |                 |
| 194                                | Elongation factor Tu, mitochondrial-like         | gi 460404036 | <i>Solanum lycopersicum</i> | 49260/6.54  | 20              | 57              |
| 195                                | Elongation factor Tu                             | K4CUX6       | <i>Solanum lycopersicum</i> | 49257/6.54  | 19              | 54              |
| <b>12.07 Translational control</b> |                                                  |              |                             |             |                 |                 |
| 58                                 | Eukaryotic translation initiation factor 5A-2    | Q9AXQ5       | <i>Solanum lycopersicum</i> | 17714/5.78  | 5               | 48              |
| 63                                 | Eukaryotic translation initiation factor 5A-2    | gi 350536449 | <i>Solanum lycopersicum</i> | 17717/5.78  | 3               | 14              |
| 64                                 | Eukaryotic translation initiation factor 1A-like | gi 460368231 | <i>Solanum lycopersicum</i> | 16652/5.01  | 5               | 32              |



**Table S1.** Continued.

| Spot no <sup>z</sup> | Matched protein                                           | ID (NCBI)                        | Organism                    | Mr/pI      | MP <sup>y</sup> | SC <sup>x</sup> |
|----------------------|-----------------------------------------------------------|----------------------------------|-----------------------------|------------|-----------------|-----------------|
| <b>14</b>            | <b>Protein fate</b>                                       | <b>14.01 Protein folding and</b> | <b>stabilization</b>        |            |                 |                 |
| 37                   | Class II small heat shock protein Le-HSP17.6              | Q96489                           | <i>Solanum lycopersicum</i> | 17670/6.32 | 9               | 67              |
| 38                   | Cytosolic class II small heat shock protein HCT2          | O82545                           | <i>Solanum lycopersicum</i> | 17379/6.75 | 2               | 16              |
| 39                   | Class II small heat shock protein Le-HSP17.6              | Q96489                           | <i>Solanum lycopersicum</i> | 17670/6.32 | 4               | 23              |
| 51                   | Class I small heat shock protein                          | G5DGD4                           | <i>Solanum lycopersicum</i> | 17621/5.57 | 12              | 61              |
| 52                   | 18.2 kDa class I heat shock protein-like isoform 1        | gi 460401599                     | <i>Solanum lycopersicum</i> | 17767/7.93 | 9               | 40              |
| 49                   | 17.8 kDa class I heat shock protein                       | P30221                           | <i>Solanum lycopersicum</i> | 17750/5.84 | 2               | 23              |
| 59                   | 17.7 kD class I small heat shock protein                  | Q9SYU8                           | <i>Solanum lycopersicum</i> | 17724/5.84 | 11              | 64              |
| 85                   | 26.5 kDa heat shock protein, mitochondrial-like isoform 1 | gi 460413910                     | <i>Solanum lycopersicum</i> | 27273/8.90 | 4               | 17              |
| 186                  | Protein disulfide isomerase-like 2-1-like                 | gi 460368877                     | <i>Solanum lycopersicum</i> | 39894/5.43 | 13              | 30              |
| 188                  | Protein disulfide isomerase-like 2-1-like                 | gi 460368877                     | <i>Solanum lycopersicum</i> | 39894/5.43 | 11              | 24              |
| 196                  | Activator of 90 kDa heat shock protein ATPase homolog     | gi 460407486                     | <i>Solanum lycopersicum</i> | 39502/5.93 | 15              | 35              |
| 218                  | Calreticulin-3-like                                       | gi 460387993                     | <i>Solanum lycopersicum</i> | 51132/6.12 | 5               | 8               |
| 219                  | Calreticulin-3-like                                       | gi 460387993                     | <i>Solanum lycopersicum</i> | 51132/6.12 | 5               | 7               |
| 233                  | Hsp70-binding protein 1-like                              | gi 460401839                     | <i>Solanum lycopersicum</i> | 43554/5.01 | 8               | 21              |
| 262                  | Protein disulfide-isomerase-like                          | gi 460389504                     | <i>Solanum lycopersicum</i> | 55113/4.81 | 11              | 20              |
| 263                  | Heat shock protein STI-like                               | gi 460400417                     | <i>Solanum lycopersicum</i> | 65415/5.99 | 26              | 45              |
| 265                  | Heat shock protein STI-like                               | gi 460400417                     | <i>Solanum lycopersicum</i> | 65415/5.99 | 9               | 12              |

**Table S1.** Continued.

| Spot no <sup>z</sup>                       | Matched protein                                               | ID (NCBI)    | Organism                    | Mr/pI       | MP <sup>y</sup> | SC <sup>z</sup> |
|--------------------------------------------|---------------------------------------------------------------|--------------|-----------------------------|-------------|-----------------|-----------------|
| <b>14.07 Protein modification</b>          |                                                               |              |                             |             |                 |                 |
| 1                                          | Ubiquitin                                                     | A3FMH5       | <i>Solanum lycopersicum</i> | 8520/6.56   | 4               | 40              |
| 2                                          | Hypothetical protein                                          | gi 643727688 | <i>Jatropha curcas</i>      | 17170/5.77  | 7               | 46              |
| 21                                         | Hypothetical protein                                          | gi 604332814 | <i>Erythranthe guttata</i>  | 41053/6.59  | 12              | 23              |
| 122                                        | Hypothetical protein                                          | gi 565466538 | <i>Capsella rubella</i>     | 49092/8.51  | 14              | 21              |
| 170                                        | 2-methylene-furan-3-one reductase                             | K4BW79       | <i>Solanum lycopersicum</i> | 40976/7.74  | 9               | 30              |
| 217                                        | Hypothetical protein                                          | gi 595853000 | <i>Prunus persica</i>       | 126047/5.05 | 23              | 15              |
| <b>14.10 Assembly of protein complexes</b> |                                                               |              |                             |             |                 |                 |
| 252                                        | Chaperonin CPN60, mitochondrial-like                          | gi 460388438 | <i>Solanum lycopersicum</i> | 61436/5.80  | 18              | 31              |
| <b>14.13 Protein degradation</b>           |                                                               |              |                             |             |                 |                 |
| 84                                         | Proteasome subunit beta type                                  | K4CCD7       | <i>Solanum lycopersicum</i> | 25383/5.51  | 4               | 20              |
| 92                                         | Proteasome subunit beta type                                  | K4BP97       | <i>Solanum lycopersicum</i> | 23104/5.29  | 7               | 29              |
| 102                                        | Proteasome subunit alpha type                                 | K4BA40       | <i>Solanum lycopersicum</i> | 27369/5.63  | 7               | 38              |
| 103                                        | Proteasome subunit alpha type                                 | K4CXX8       | <i>Solanum lycopersicum</i> | 25659/5.39  | 7               | 39              |
| 112                                        | Proteasome subunit alpha type                                 | K4DC02       | <i>Solanum lycopersicum</i> | 27415/6.11  | 3               | 14              |
| 123                                        | Proteasome subunit alpha type                                 | K4B832       | <i>Solanum lycopersicum</i> | 26253/4.72  | 13              | 55              |
| 247                                        | Probable mitochondrial-processing peptidase subunit beta-like | gi 565342500 | <i>Solanum lycopersicum</i> | 59352/5.96  | 17              | 32              |
| 248                                        | Mitochondrial-processing peptidase subunit alpha-like         | gi 460412524 | <i>Solanum lycopersicum</i> | 54873/6.05  | 13              | 32              |
| 258                                        | 26S protease regulatory subunit 6A homolog                    | P54776       | <i>Solanum lycopersicum</i> | 47704/4.94  | 22              | 51              |
| 259                                        | 26S protease regulatory subunit 6A homolog                    | P54776       | <i>Solanum lycopersicum</i> | 47704/4.95  | 7               | 17              |
| 267                                        | Probable mitochondrial-processing peptidase subunit beta-like | gi 460386762 | <i>Solanum lycopersicum</i> | 59718/6.16  | 16              | 35              |

**Table S1.** Continued.

| Spot no <sup>z</sup>                                            | Matched protein                                       | ID (NCBI)                    | Organism                    | Mr/pI      | MP <sup>y</sup> | SC <sup>z</sup> |
|-----------------------------------------------------------------|-------------------------------------------------------|------------------------------|-----------------------------|------------|-----------------|-----------------|
| <b>16 Protein with binding function or cofactor requirement</b> |                                                       | <b>16.01 Protein binding</b> |                             |            |                 |                 |
| 107                                                             | Harpin binding protein 1                              | Q5QJB4                       | <i>Solanum lycopersicum</i> | 30293/6.25 | 12              | 49              |
| 108                                                             | Harpin binding protein 1                              | Q5QJB4                       | <i>Solanum lycopersicum</i> | 30293/6.25 | 7               | 27              |
| 135                                                             | Gamma carbonic anhydrase 1, mitochondrial-like        | gi 460373230                 | <i>Solanum lycopersicum</i> | 29418/6.25 | 7               | 30              |
| <b>16.02 Peptide binding</b>                                    |                                                       |                              |                             |            |                 |                 |
| 153                                                             | Ran binding protein-1                                 | Q94K24                       | <i>Solanum lycopersicum</i> | 25229/4.88 | 6               | 40              |
| 154                                                             | Ran binding protein-1                                 | Q94K24                       | <i>Solanum lycopersicum</i> | 25229/4.88 | 9               | 54              |
| <b>16.03 Nucleic acid binding</b>                               |                                                       |                              |                             |            |                 |                 |
| 29                                                              | Glycine rich RNA binding protein 1a                   | L7Q568                       | <i>Solanum lycopersicum</i> | 15927/5.53 | 10              | 76              |
| 30                                                              | Glycine-rich RNA-binding protein-like isoform 2       | gi 460370204                 | <i>Solanum lycopersicum</i> | 16495/5.58 | 7               | 44              |
| 78                                                              | Cold shock domain-containing protein 4-like isoform 5 | gi 460370361                 | <i>Solanum lycopersicum</i> | 17827/5.63 | 4               | 32              |
| <b>16.13 C-compound binding</b>                                 |                                                       |                              |                             |            |                 |                 |
| 4                                                               | Uncharacterized protein                               | K4CMT6                       | <i>Solanum lycopersicum</i> | 10091/5.40 | 2               | 24              |
| <b>16.17 Metal binding</b>                                      |                                                       |                              |                             |            |                 |                 |
| 32                                                              | Beta myrcene/limonene synthase                        | G1JUH4                       | <i>Solanum lycopersicum</i> | 69591/5.98 | 3               | 6               |
| 87                                                              | Sulfite oxidase                                       | A5H1Q7                       | <i>Solanum lycopersicum</i> | 43580/8.43 | 8               | 20              |
| 214                                                             | Ankyrin repeat domain-containing protein 2-like       | gi 460369292                 | <i>Solanum lycopersicum</i> | 37357/4.43 | 6               | 19              |
| <b>16.19 Nucleotide binding</b>                                 |                                                       |                              |                             |            |                 |                 |
| 24                                                              | Fen-interacting protein 3                             | K4CGU0                       | <i>Solanum lycopersicum</i> | 17280/6.74 | 4               | 17              |
| 273                                                             | CTR1-like protein kinase                              | Q5YKK6                       | <i>Solanum lycopersicum</i> | 89563/5.66 | 12              | 14              |

**Table S1.** Continued.

| Spot no <sup>z</sup>                                                                                     | Matched protein                                    | ID (NCBI)    | Organism                    | Mr/pI      | MP <sup>y</sup> | SC <sup>z</sup> |
|----------------------------------------------------------------------------------------------------------|----------------------------------------------------|--------------|-----------------------------|------------|-----------------|-----------------|
| <b>18 Protein activity regulation    18.02 Target of regulation</b>                                      |                                                    |              |                             |            |                 |                 |
| 60                                                                                                       | BTF3-like transcription factor                     | Q2PQI9       | <i>Solanum lycopersicum</i> | 17397/6.85 | 11              | 59              |
| <b>20 Cellular transport, transport facilitation and transport routes    20.01 Transported compounds</b> |                                                    |              |                             |            |                 |                 |
| 9                                                                                                        | Nucleoside diphosphate kinase                      | P47921       | <i>Solanum lycopersicum</i> | 15726/7.04 | 6               | 35              |
| 12                                                                                                       | Nucleoside diphosphate kinase                      | P47921       | <i>Solanum lycopersicum</i> | 15726/7.04 | 5               | 33              |
| <b>20.03 Transport facilitation</b>                                                                      |                                                    |              |                             |            |                 |                 |
| 40                                                                                                       | ATP synthase epsilon chain, chloroplastic          | Q2MI94       | <i>Solanum lycopersicum</i> | 14571/5.43 | 6               | 50              |
| 136                                                                                                      | V-type proton ATPase subunit E-like                | gi 460400045 | <i>Solanum lycopersicum</i> | 26667/6.33 | 10              | 29              |
| 137                                                                                                      | V-type proton ATPase subunit E-like                | gi 460400045 | <i>Solanum lycopersicum</i> | 26667/6.33 | 10              | 32              |
| 231                                                                                                      | V-type proton ATPase subunit B2-like isoform 2     | gi 460370437 | <i>Solanum lycopersicum</i> | 54298/4.99 | 8               | 14              |
| 232                                                                                                      | V-type proton ATPase subunit B2-like isoform 2     | gi 460370437 | <i>Solanum lycopersicum</i> | 54298/4.99 | 17              | 43              |
| 243                                                                                                      | ATPase subunit 1 (mitochondrion)                   | gi 568245146 | <i>Ajuga reptans</i>        | 55278/6.59 | 6               | 16              |
| 274                                                                                                      | Vacuolar H <sup>+</sup> -ATPase A1 subunit isoform | Q84XW6       | <i>Solanum lycopersicum</i> | 68812/5.20 | 13              | 21              |
| 276                                                                                                      | vacuolar H <sup>+</sup> -ATPase A1 subunit isoform | gi 350537129 | <i>Solanum lycopersicum</i> | 68817/5.20 | 12              | 19              |
| 277                                                                                                      | Vacuolar H <sup>+</sup> -ATPase A1 subunit isoform | Q84XW6       | <i>Solanum lycopersicum</i> | 68812/5.20 | 14              | 27              |
| 278                                                                                                      | Vacuolar H <sup>+</sup> -ATPase A1 subunit isoform | Q84XW6       | <i>Solanum lycopersicum</i> | 68812/5.20 | 13              | 24              |
| <b>20.09 Transport routes</b>                                                                            |                                                    |              |                             |            |                 |                 |
| 53                                                                                                       | Tubulin-specific chaperone A-like                  | gi 460366584 | <i>Solanum lycopersicum</i> | 13096/4.92 | 7               | 48              |
| 244                                                                                                      | Leucine aminopeptidase 2, chloroplastic            | Q42876       | <i>Solanum lycopersicum</i> | 60082/8.18 | 15              | 29              |
| 246                                                                                                      | Leucine aminopeptidase 2, chloroplastic            | Q42876       | <i>Solanum lycopersicum</i> | 60082/8.18 | 11              | 20              |

**Table S1.** Continued.

| Spot no <sup>z</sup>                                           | Matched protein                                                                 | ID (NCBI)                             | Organism                    | Mr/pI      | MP <sup>y</sup> | SC <sup>z</sup> |
|----------------------------------------------------------------|---------------------------------------------------------------------------------|---------------------------------------|-----------------------------|------------|-----------------|-----------------|
| <b>30 Cellular communication/signal transduction mechanism</b> |                                                                                 | <b>30.01 Intracellular signalling</b> |                             |            |                 |                 |
| 80                                                             | Guanine deaminase-like isoform 1                                                | gi 460368541                          | <i>Solanum lycopersicum</i> | 20639/5.27 | 6               | 36              |
| <b>30.05 Transmembranesignaltransduction</b>                   |                                                                                 |                                       |                             |            |                 |                 |
| 36                                                             | Integrin-linked protein kinase family isoform 3                                 | gi 590654217                          | <i>Theobroma cacao</i>      | 53850/9.28 | 14              | 22              |
| <b>32 Cell rescue, defense, and virulence</b>                  |                                                                                 | <b>32.01 Stress response</b>          |                             |            |                 |                 |
| 25                                                             | Superoxide dismutase [Cu-Zn], chloroplastic                                     | P14831                                | <i>Solanum lycopersicum</i> | 22328/5.77 | 1               | 11              |
| 33                                                             | Superoxide dismutase [Cu-Zn] 1                                                  | P14830                                | <i>Solanum lycopersicum</i> | 15408/5.83 | 4               | 38              |
| 50                                                             | PR10 protein                                                                    | K4CWC4                                | <i>Solanum lycopersicum</i> | 17472/5.44 | 8               | 54              |
| 66                                                             | Thioredoxin peroxidase 1                                                        | Q7Y240                                | <i>Solanum lycopersicum</i> | 17540/5.18 | 7               | 45              |
| 152                                                            | Thiamine thiazole synthase, chloroplastic                                       | K4CH99                                | <i>Solanum lycopersicum</i> | 37677/5.42 | 11              | 37              |
| 175                                                            | Dehydrin                                                                        | V5QQM9                                | <i>Solanum lycopersicum</i> | 23138/5.17 | 8               | 40              |
| 176                                                            | Dehydrin                                                                        | V5QQM9                                | <i>Solanum lycopersicum</i> | 23138/5.18 | 6               | 25              |
| 199                                                            | Monodehydroascorbate reductase                                                  | Q43497                                | <i>Solanum lycopersicum</i> | 47120/5.77 | 11              | 30              |
| 201                                                            | Monodehydroascorbate reductase                                                  | Q43497                                | <i>Solanum lycopersicum</i> | 47120/5.77 | 11              | 32              |
| 241                                                            | Suberization-associated anionic peroxidase 1                                    | P15003                                | <i>Solanum lycopersicum</i> | 39295/4.92 | 5               | 16              |
| 242                                                            | Suberization-associated anionic peroxidase 1                                    | P15003                                | <i>Solanum lycopersicum</i> | 39295/4.93 | 5               | 16              |
| <b>32.07 Detoxification</b>                                    |                                                                                 |                                       |                             |            |                 |                 |
| 113                                                            | Ascorbate peroxidase                                                            | Q52QQ4                                | <i>Solanum lycopersicum</i> | 27590/5.86 | 5               | 32              |
| 115                                                            | Cytosolic ascorbate peroxidase 1                                                | Q3I5C4                                | <i>Solanum lycopersicum</i> | 27733/5.61 | 10              | 44              |
| 116                                                            | Cytosolic ascorbate peroxidase isoform 3 (Fragment)                             | Q09Y78                                | <i>Solanum lycopersicum</i> | 11131/8.96 | 7               | 56              |
| 117                                                            | Cytosolic ascorbate peroxidase 1                                                | Q3I5C4                                | <i>Solanum lycopersicum</i> | 27733/5.61 | 11              | 50              |
| 118                                                            | Cytosolic ascorbate peroxidase 1                                                | Q3I5C4                                | <i>Solanum lycopersicum</i> | 27733/5.61 | 6               | 34              |
| 120                                                            | LOW QUALITY PROTEIN: L-ascorbate peroxidase S, chloroplastic/mitochondrial-like | gi 460392865                          | <i>Solanum lycopersicum</i> | 42710/8.12 | 14              | 36              |
| 129                                                            | Cytosolic ascorbate peroxidase 1                                                | Q3I5C4                                | <i>Solanum lycopersicum</i> | 27733/5.61 | 10              | 48              |

**Table S1.** Continued.

| Spot no <sup>z</sup>                                                                                   | Matched protein                                           | ID (NCBI)    | Organism                    | Mr/pI       | MP <sup>y</sup> | SC <sup>z</sup> |
|--------------------------------------------------------------------------------------------------------|-----------------------------------------------------------|--------------|-----------------------------|-------------|-----------------|-----------------|
| <b>34 Interaction with the cellular environment 34.11 Cellularsensingandresponse</b>                   |                                                           |              |                             |             |                 |                 |
| 10                                                                                                     | Temperature-induced lipocalin                             | Q38JD4       | <i>Solanum lycopersicum</i> | 21509/6.16  | 10              | 51              |
| 61                                                                                                     | Temperature-induced lipocalin                             | Q38JE1       | <i>Solanum lycopersicum</i> | 21303/5.96  | 5               | 31              |
| 65                                                                                                     | Temperature-induced lipocalin                             | Q38JE1       | <i>Solanum lycopersicum</i> | 21303/5.96  | 7               | 43              |
| <b>36 Interaction with the environment 36.20 Plant / fungal specific systemic sensing and response</b> |                                                           |              |                             |             |                 |                 |
| 133                                                                                                    | Salicylate O-methyltransferase-like                       | gi 460373240 | <i>Solanum lycopersicum</i> | 42625/5.50  | 5               | 9               |
| <b>41 Development 41.03 Plant development</b>                                                          |                                                           |              |                             |             |                 |                 |
| 105                                                                                                    | Fruit protein pKIWI502-like                               | gi 460386364 | <i>Solanum lycopersicum</i> | 32756/7.10  | 10              | 39              |
| 155                                                                                                    | Ripening regulated protein DDTFR10                        | Q9FR30       | <i>Solanum lycopersicum</i> | 22180/4.72  | 6               | 21              |
| <b>42 Biogenesis of cellular components 42.01 Cell wall</b>                                            |                                                           |              |                             |             |                 |                 |
| 167                                                                                                    | UDP-glucose:protein transglucosylase-like protein SIUPTG1 | Q6IV07       | <i>Solanum lycopersicum</i> | 41736/5.85  | 3               | 6               |
| <b>42.03 Cytoplasm</b>                                                                                 |                                                           |              |                             |             |                 |                 |
| 72                                                                                                     | <b>Translationally-controlled tumor protein homolog</b>   | Q6DUX3       | <i>Solanum lycopersicum</i> | 19011/4.55  | 2               | 10              |
| 76                                                                                                     | Translationally-controlled tumor protein homolog          | Q6DUX3       | <i>Solanum lycopersicum</i> | 19011/4.55  | 1               | 5               |
| <b>42.04 Cytoskeleton</b>                                                                              |                                                           |              |                             |             |                 |                 |
| 143                                                                                                    | Annexin                                                   | K4BSR4       | <i>Solanum lycopersicum</i> | 36291/5.55  | 22              | 62              |
| 171                                                                                                    | Annexin                                                   | O81536       | <i>Solanum lycopersicum</i> | 35894/5.39  | 18              | 49              |
| 172                                                                                                    | Annexin                                                   | O81536       | <i>Solanum lycopersicum</i> | 35894/5.39  | 10              | 29              |
| 203                                                                                                    | Actin-7-like                                              | gi 460408874 | <i>Solanum lycopersicum</i> | 41990/5.31  | 10              | 41              |
| 205                                                                                                    | Actin-7-like                                              | gi 460378623 | <i>Solanum lycopersicum</i> | 41963/5.31  | 16              | 55              |
| 206                                                                                                    | Actin-7-like                                              | gi 460408874 | <i>Solanum lycopersicum</i> | 41990/5.31  | 13              | 45              |
| 207                                                                                                    | Actin-7-like                                              | gi 460378623 | <i>Solanum lycopersicum</i> | 41963/5.31  | 18              | 57              |
| 210                                                                                                    | Actin-7-like                                              | gi 460378623 | <i>Solanum lycopersicum</i> | 41963/5.31  | 17              | 57              |
| 211                                                                                                    | Actin-7-like                                              | gi 460378623 | <i>Solanum lycopersicum</i> | 41963/5.31  | 14              | 49              |
| <b>70 Subcellular location 70.27 Extracellular /secretion proteins</b>                                 |                                                           |              |                             |             |                 |                 |
| 270                                                                                                    | Ethylene overproducer-like 1                              | Q4F8Q5       | <i>Solanum lycopersicum</i> | 102181/5.57 | 11              | 12              |

**Table S1.** Continued.

| Spot no <sup>z</sup>    | Matched protein           | ID (NCBI)    | Organism                     | Mr/pI       | MP <sup>y</sup> | SC <sup>z</sup> |
|-------------------------|---------------------------|--------------|------------------------------|-------------|-----------------|-----------------|
| <b>98 Un classified</b> |                           |              |                              |             |                 |                 |
| 3                       | Uncharacterized protein   | gi 460387665 | <i>Solanum lycopersicum</i>  | 205471/4.76 | 19              | 9               |
| 5                       | Uncharacterized protein   | K4BDL5       | <i>Solanum lycopersicum</i>  | 13679/5.85  | 2               | 11              |
| 6                       | Uncharacterized protein   | K4B7E7       | <i>Solanum lycopersicum</i>  | 13624/5.80  | 3               | 45              |
| 7                       | Uncharacterized protein   | K4BRR1       | <i>Solanum lycopersicum</i>  | 12502/6.75  | 5               | 52              |
| 11                      | Dihydroneopterin aldolase | Q6TFM2       | <i>Solanum lycopersicum</i>  | 14639/6.29  | 5               | 44              |
| 15                      | Uncharacterized protein   | K4BIC8       | <i>Solanum lycopersicum</i>  | 16917/4.90  | 8               | 43              |
| 17                      | Uncharacterized protein   | K4CND0       | <i>Solanum lycopersicum</i>  | 10507/9.98  | 4               | 46              |
| 20                      | Predicted protein         | gi 162667764 | <i>Physcomitrella patens</i> | 33133/9.50  | 10              | 23              |
| 22                      | Uncharacterized protein   | K4D318       | <i>Solanum lycopersicum</i>  | 14399/5.50  | 7               | 58              |
| 26                      | Uncharacterized protein   | K4B3H9       | <i>Solanum lycopersicum</i>  | 17390/5.58  | 6               | 49              |
| 28                      | Uncharacterized protein   | K4CL22       | <i>Solanum lycopersicum</i>  | 17381/6.75  | 4               | 42              |
| 31                      | Uncharacterized protein   | K4BSP6       | <i>Solanum lycopersicum</i>  | 21233/5.79  | 4               | 38              |
| 34                      | Uncharacterized protein   | K4B3H9       | <i>Solanum lycopersicum</i>  | 17390/5.58  | 12              | 58              |
| 35                      | Uncharacterized protein   | K4BIL3       | <i>Solanum lycopersicum</i>  | 19905/6.29  | 5               | 21              |
| 41                      | Uncharacterized protein   | K4B3H9       | <i>Solanum lycopersicum</i>  | 17390/5.58  | 8               | 46              |
| 42                      | Uncharacterized protein   | K4D3F2       | <i>Solanum lycopersicum</i>  | 24649/8.60  | 10              | 50              |
| 43                      | Uncharacterized protein   | K4CF87       | <i>Solanum lycopersicum</i>  | 55895/5.65  | 6               | 15              |
| 45                      | Uncharacterized protein   | K4D399       | <i>Solanum lycopersicum</i>  | 16706/6.20  | 9               | 69              |
| 46                      | Uncharacterized protein   | gi 460410122 | <i>Solanum lycopersicum</i>  | 123563/7.37 | 3               | 2               |
| 47                      | Predicted protein         | gi 162667764 | <i>Physcomitrella patens</i> | 33133/9.50  | 5               | 13              |
| 54                      | Uncharacterized protein   | K4B0D2       | <i>Solanum lycopersicum</i>  | 19665/4.81  | 4               | 34              |
| 55                      | Uncharacterized protein   | K4B1M2       | <i>Solanum lycopersicum</i>  | 21631/7.90  | 12              | 51              |
| 56                      | Uncharacterized protein   | K4BKP5       | <i>Solanum lycopersicum</i>  | 21524/6.93  | 11              | 52              |
| 57                      | Uncharacterized protein   | K4B2H1       | <i>Solanum lycopersicum</i>  | 69241/8.44  | 12              | 14              |
| 62                      | Uncharacterized protein   | K4B276       | <i>Solanum lycopersicum</i>  | 25029/9.03  | 8               | 32              |

**Table S1.** Continued.

| Spot no <sup>z</sup> | Matched protein                                              | ID (NCBI)    | Organism                    | Mr/pI      | MP <sup>y</sup> | SC <sup>z</sup> |
|----------------------|--------------------------------------------------------------|--------------|-----------------------------|------------|-----------------|-----------------|
| 86                   | Uncharacterized protein                                      | K4CXJ6       | <i>Solanum lycopersicum</i> | 21655/5.74 | 5               | 39              |
| 88                   | Uncharacterized protein                                      | gi 460406712 | <i>Solanum lycopersicum</i> | 23448/8.80 | 8               | 43              |
| 91                   | Uncharacterized protein                                      | K4BUN4       | <i>Solanum lycopersicum</i> | 28997/6.86 | 9               | 35              |
| 93                   | Uncharacterized protein                                      | K4DC13       | <i>Solanum lycopersicum</i> | 22403/5.32 | 12              | 65              |
| 94                   | Uncharacterized protein                                      | K4C3T2       | <i>Solanum lycopersicum</i> | 23708/5.98 | 8               | 62              |
| 109                  | Uncharacterized protein LOC101254447 isoform 2               | gi 460375040 | <i>Solanum lycopersicum</i> | 37582/4.90 | 9               | 16              |
| 110                  | LePCL1 protein (Fragment)                                    | Q4H2B2       | <i>Solanum lycopersicum</i> | 20959/4.90 | 4               | 11              |
| 119                  | Uncharacterized protein At2g37660, chloroplastic-like        | gi 460401841 | <i>Solanum lycopersicum</i> | 33614/9.18 | 12              | 43              |
| 121                  | Uncharacterized protein At2g37660, chloroplastic-like        | gi 460401841 | <i>Solanum lycopersicum</i> | 33614/9.18 | 11              | 35              |
| 126                  | Protein usf-like                                             | gi 460389005 | <i>Solanum lycopersicum</i> | 31269/6.66 | 9               | 32              |
| 127                  | Protein usf-like                                             | gi 460389005 | <i>Solanum lycopersicum</i> | 31269/6.66 | 9               | 32              |
| 130                  | Uncharacterized protein                                      | gi 460413472 | <i>Solanum lycopersicum</i> | 82147/6.58 | 11              | 10              |
| 131                  | LePCL1 protein (Fragment)                                    | Q4H2B2       | <i>Solanum lycopersicum</i> | 20959/4.90 | 4               | 11              |
| 132                  | Uncharacterized protein                                      | K4B0D2       | <i>Solanum lycopersicum</i> | 98193/8.56 | 17              | 14              |
| 134                  | Uncharacterized protein                                      | K4BV04       | <i>Solanum lycopersicum</i> | 34744/6.17 | 9               | 18              |
| 147                  | Uncharacterized protein                                      | gi 460391932 | <i>Solanum lycopersicum</i> | 39177/9.93 | 10              | 26              |
| 156                  | Uncharacterized protein                                      | gi 460398472 | <i>Solanum lycopersicum</i> | 35095/4.66 | 7               | 26              |
| 173                  | Uncharacterized protein                                      | gi 460413263 | <i>Solanum lycopersicum</i> | 52779/9.59 | 5               | 8               |
| 179                  | Uncharacterized oxidoreductase At1g06690, chloroplastic-like | gi 460396131 | <i>Solanum lycopersicum</i> | 40913/7.57 | 9               | 24              |
| 181                  | Uncharacterized protein LOC101259630 isoform 2               | gi 460385481 | <i>Solanum lycopersicum</i> | 32725/9.89 | 12              | 29              |
| 182                  | Uncharacterized protein LOC101259630 isoform 2               | gi 460385481 | <i>Solanum lycopersicum</i> | 32725/9389 | 9               | 25              |
| 215                  | Uncharacterized protein LOC101259630 isoform 2               | gi 460385481 | <i>Solanum lycopersicum</i> | 32725/9.89 | 10              | 20              |
| 216                  | Uncharacterized protein LOC101259630 isoform 2               | gi 460385481 | <i>Solanum lycopersicum</i> | 32725/9.89 | 10              | 20              |
| 238                  | Uncharacterized protein LOC101259630 isoform 2               | gi 460385481 | <i>Solanum lycopersicum</i> | 32725/9.89 | 10              | 27              |



**Table S1.** Continued.

| Spot no <sup>z</sup> | Matched protein                                  | ID (NCBI)    | Organism                    | Mr/pI      | MP <sup>y</sup> | SC <sup>z</sup> |
|----------------------|--------------------------------------------------|--------------|-----------------------------|------------|-----------------|-----------------|
| 239                  | Uncharacterized protein At5g39570-like isoform 2 | gi 460372789 | <i>Solanum lycopersicum</i> | 39883/4.67 | 21              | 40              |
| 240                  | LePCL1 protein (Fragment)                        | Q4H2B2       | <i>Solanum lycopersicum</i> | 20959/4.90 | 5               | 14              |
| 256                  | Uncharacterized protein                          | gi 460373077 | <i>Solanum lycopersicum</i> | 25030/9.67 | 5               | 18              |
| 257                  | Uncharacterized protein LOC101259630 isoform 2   | gi 460385481 | <i>Solanum lycopersicum</i> | 32725/9.89 | 12              | 27              |

<sup>z</sup>Spot numbers identified from 2D gel presented in Figure 2.

<sup>y</sup>Ratio of matched peptides that protein classified or unclassified on the function category was based on the ‘GO-MIPS funcat conversion table’ set up at the Munich Information Center for Protein Sequences (MIPS Institute).

<sup>x</sup>Sequence coverage (%).
